## Corrigendum

### eFGF is required for activation of *XmyoD* expression in the myogenic cell lineage of *Xenopus laevis*

Fisher, E. M., Isaacs, H. V. and Pownall, M. E. (2002). *Development* 129, 1307-1315

Fig. 1B of this paper shows the expression of *Xmyf5* and not *XmyoD* as stated. As a consequence, the first paragraph of the Results section is inaccurate. The correct figure and text are given here and in the online versions.

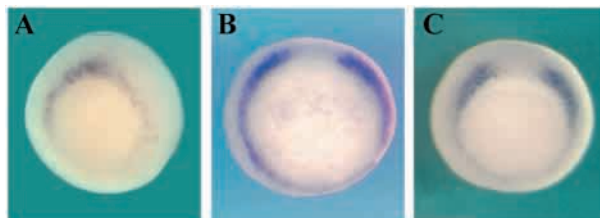

**Fig. 1.** The normal expression patterns of *eFGF* and *XmyoD* showing co-expression in the early mesoderm. Whole-mount in situ hybridisation showing expression of (A) *eFGF* at stage 10, (B) *XmyoD* at stage 10 and (C) *XmyoD* at stage 10 (+). Expression of *XmyoD* across the dorsal midline is rapidly excluded as Spemann's organiser signalling is established.

## RESULTS

### eFGF and *XmyoD* are co-expressed in the early mesoderm

As discussed above, there is evidence to suggest a role for FGF signalling during myogenesis. We show that the expression domains of *XmyoD* and *eFGF* overlap in the early mesoderm. Both genes are initially co-expressed within a region that encompasses much of the mesoderm (Fig. 1).

## ADDITIONAL INFORMATION

The authors have supplied additional data to illustrate that the expression of these two genes is similar at this stage, as shown below.

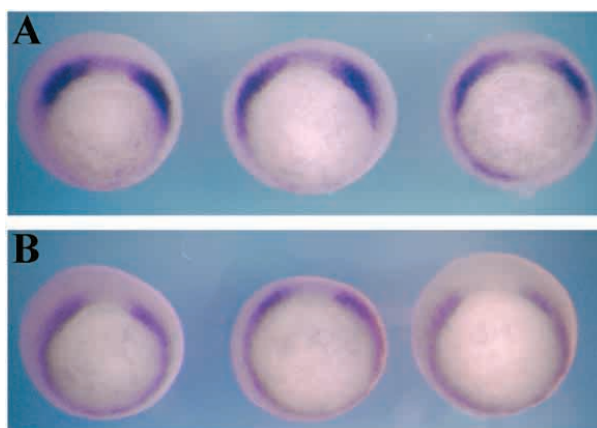

The normal expression of *Xmyf5* and *XmyoD* at early gastrula stage 10. Whole-mount in situ hybridisation shows that *Xmyf5* expression (A) is strong dorsally and spans the dorsal midline. *XmyoD* (B) is expressed more evenly throughout the marginal zone but is excluded from the dorsal midline.
